# Supplementary material
Source: PubMed Central journal article supplement (PMC2597450)
Supplement: NIHMS64884-supplement-1_s.pdf [file NIHMS64884-supplement-1_s.pdf]

**Supplemental Information**

**Conversion of the Potent  $\delta$ -Opioid Agonist H-Dmt-Tic-NH-  
CH<sub>2</sub>-Bid into  $\delta$ -Opioid Antagonists by N<sup>1</sup>-Benzimidazole  
Alkylation**

Gianfranco Balboni<sup>\*</sup>, Remo Guerrini<sup>†</sup>, Severo Salvadori<sup>†</sup>, Lucia Negri<sup>‡</sup>, Elisa Giannini<sup>‡</sup>,  
Sharon D. Bryant<sup>§</sup>, Yunden Jinsmaa<sup>§</sup>, Lawrence H. Lazarus<sup>§¶</sup>

*<sup>\*</sup>Department of Toxicology, University of Cagliari, I-09124, Cagliari, Italy, <sup>†</sup>Department of Pharmaceutical Sciences and Biotechnology Center, University of Ferrara, I-44100 Ferrara, Italy, <sup>‡</sup>Department of Human Physiology and Pharmacology "Vittorio Erspamer," University La Sapienza, I-00185 Rome, Italy, <sup>§</sup>Medicinal Chemistry Group, Laboratory of Pharmacology and Chemistry, National Institute of Environmental Health Sciences, Research Triangle Park, NC 27709, USA*

## Experimental

**General Methods** Crude peptides were purified by preparative reversed-phase HPLC [Waters Delta Prep 4000 system with Waters Prep LC 40 mm Assembly column C18 (30 cm x 4 cm, 15  $\mu$ m particle)] and eluted at a flow rate of 40 mL/min with mobile phase A (10% acetonitrile + 0.1% TFA in H<sub>2</sub>O, v/v), and a linear gradient from 25 to 75% B (60% acetonitrile + 0.1% TFA in H<sub>2</sub>O, v/v) in 25 min. Analytical HPLC analyses were performed with a Beckman System Gold (Beckman ultrasphere ODS column, 250 mm x 4.6 mm, 5  $\mu$ m particle). Analytical determinations and capacity factor ( $K'$ ) of the products used HPLC in solvents A and B programmed at flow rate of 1 mL/min with linear gradients from 0 to 100% B in 25 min. Analogues had less than 1% impurities at 220 and 254 nm.

TLC was performed on precoated plates of silica gel F254 (Merck, Darmstadt, Germany): (A) 1-butanol/AcOH/H<sub>2</sub>O (3:1:1, v/v/v); (B) CH<sub>2</sub>Cl<sub>2</sub>/toluene/methanol (17:1:2). Ninhydrin (1% ethanol, Merck), fluorescamine (Hoffman-La Roche) and chlorine spray reagents. Melting points were determined on a Kofler apparatus and are uncorrected. Optical rotations were assessed at 10 mg/mL in methanol with a Perkin-Elmer 241 polarimeter in a 10 cm water-jacketed cell. Molecular weights of the compounds were determined by a MALDI-TOF analysis (Hewlett Packard G2025A LD-TOF system mass spectrometer) and  $\alpha$ -cyano-4-hydroxycinnamic acid as a matrix. <sup>1</sup>H NMR ( $\delta$ ) spectra were measured, when not specified, in DMSO solution using a Bruker AC-200 spectrometer, and peak positions are given in parts per million downfield from tetramethylsilane as internal standard. Elemental Analysis is in the accompanying Table.

**Peptide Synthesis**

***Tert*-butyl-3-((1-methyl-1*H*-benzo[*d*]imidazol-2-yl)methylcarbamoyl)-3,4-dihydroiso-quinoline-2(1*H*)-carboxylate [Boc-Tic-NH-CH<sub>2</sub>-Bid(N<sup>1</sup>-CH<sub>3</sub>)].** To a solution of Boc-Tic-NH-CH<sub>2</sub>-Bid.<sup>9</sup> (0.20 g, 0.49 mmol) in DMF (10 mL) at room temperature, K<sub>2</sub>CO<sub>3</sub> (0.24 g, 1.72 mmol) and, after 1 h, iodomethane, (0.03 mL, 0.52 mmol) were added. The reaction mixture was stirred for 24 h at room temperature. After DMF was evaporated, the residue was dissolved in EtOAc and washed with NaHCO<sub>3</sub> (5% in H<sub>2</sub>O) and brine. The organic phase was dried (Na<sub>2</sub>SO<sub>4</sub>) and evaporated to dryness. The residue was precipitated from Et<sub>2</sub>O/Pe (1:9, v/v): yield 0.18 g (88%); R<sub>f</sub> (B) 0.84; HPLC K' 5.86; mp 145-147 °C; [α]<sup>20</sup><sub>D</sub> -13.5; MH<sup>+</sup> 421 <sup>1</sup>H NMR (DMSO-*d*<sub>6</sub>) δ 1.30-1.40 (m, 9H), 2.92-3.17 (m, 2H), 3.63 (s, 3H), 4.17-4.27 (m, 2H), 4.46 (m, 1H), 4.92 (m, 1H), 6.96-7.70 (m, 8H).

***Tert*-butyl-3-((1-benzyl-1*H*-benzo[*d*]imidazol-2-yl)methylcarbamoyl)-3,4-dihydroiso-quinoline-2(1*H*)-carboxylate [Boc-Tic-NH-CH<sub>2</sub>-Bid(N<sup>1</sup>-CH<sub>2</sub>-C<sub>6</sub>H<sub>5</sub>)].** This compound was obtained by alkylation of Boc-Tic-NH-CH<sub>2</sub>-Bid with K<sub>2</sub>CO<sub>3</sub> and benzyl bromide as reported for Boc-Tic-NH-CH<sub>2</sub>-Bid(N<sup>1</sup>-CH<sub>3</sub>): yield 0.19 g (89%); R<sub>f</sub> (B) 0.88; HPLC K' 7.92; mp 148-150 °C; [α]<sup>20</sup><sub>D</sub> -12.1; MH<sup>+</sup> 498; <sup>1</sup>H NMR (DMSO-*d*<sub>6</sub>) δ 1.30-1.40 (m, 9H), 2.92-3.17 (m, 2H), 4.17-4.27 (m, 2H), 4.46 (m, 1H), 4.92-4.99 (m, 3H), 6.96-7.70 (m, 13H).

***Tert*-butyl-3-((1-allyl-1*H*-benzo[*d*]imidazol-2-yl)methylcarbamoyl)-3,4-dihydroiso-quinoline-2(1*H*)-carboxylate [Boc-Tic-NH-CH<sub>2</sub>-Bid(N<sup>1</sup>-CH<sub>2</sub>-CH=CH<sub>2</sub>)].** This compound was obtained by alkylation of Boc-Tic-NH-CH<sub>2</sub>-Bid with K<sub>2</sub>CO<sub>3</sub> and allyl bromide as reported for Boc-Tic-NH-CH<sub>2</sub>-Bid(N<sup>1</sup>-CH<sub>3</sub>): yield 0.20 g (91%); R<sub>f</sub> (B) 0.85;

HPLC K' 6.40; mp 140-141 °C;  $[\alpha]_D^{20}$  -10.7;  $MH^+$  448;  $^1H$  NMR (DMSO- $d_6$ )  $\delta$  1.30-1.40 (m, 9H), 2.92-3.17 (m, 2H), 4.17-4.27 (m, 2H), 4.40-4.46 (m, 4H), 4.92 (m, 1H), 5.15-5.17 (m, 2H), 5.83 (m, 1H), 6.96-7.70 (m, 8H).

***Tert*-butyl-3-((1-(cyclopropylmethyl)-1*H*-benzo[*d*]imidazol-2-yl)methylcarbamoyl)-3,4-dihydroisoquinoline-2(1*H*)-carboxylate [Boc-Tic-NH-CH<sub>2</sub>-Bid(N<sup>1</sup>-CH<sub>2</sub>-c(C<sub>3</sub>H<sub>5</sub>))].** This compound was obtained by alkylation of Boc-Tic-NH-CH<sub>2</sub>-Bid with K<sub>2</sub>CO<sub>3</sub> and cyclopropylmethyl bromide as reported for Boc-Tic-NH-CH<sub>2</sub>-Bid(N<sup>1</sup>-CH<sub>3</sub>): yield 0.16 g (84%); R<sub>f</sub> (B) 0.84; HPLC K' 6.11; mp 142-144 °C;  $[\alpha]_D^{20}$  -10.1;  $MH^+$  462  $^1H$  NMR (DMSO- $d_6$ )  $\delta$  0.06- 0.31 (m, 5H), 1.30-1.40 (m, 9H), 2.92-3.17 (m, 2H), 3.69 (m, 2H), 4.17-4.27 (m, 2H), 4.46 (m, 2H), 4.92 (m, 1H), 6.96-7.70 (m, 8H).

**2TFA·H-Tic-NH-CH<sub>2</sub>-Bid(N<sup>1</sup>-CH<sub>3</sub>).** Boc-Tic-NH-CH<sub>2</sub>-Bid(N<sup>1</sup>-CH<sub>3</sub>) (0.18 g, 0.43 mmol) was treated with TFA (1 mL) for 0.5 h at room temperature. Et<sub>2</sub>O/Pe (1:1, v/v) were added to the solution until the product precipitated: yield 0.22 g (93%); R<sub>f</sub> (A) 0.49; HPLC K' 3.01; mp 175-177 °C;  $[\alpha]_D^{20}$  -15.9;  $MH^+$  321.

**2TFA·H-Tic-NH-CH<sub>2</sub>-Bid(N<sup>1</sup>-CH<sub>2</sub>-C<sub>6</sub>H<sub>5</sub>).** Boc-Tic-NH-CH<sub>2</sub>-Bid(N<sup>1</sup>-CH<sub>2</sub>-C<sub>6</sub>H<sub>5</sub>) was treated with TFA as reported for 2TFA·H-Tic-NH-CH<sub>2</sub>-Bid(N<sup>1</sup>-CH<sub>3</sub>): yield 0.16 g (91%); R<sub>f</sub> (A) 0.53; HPLC K' 5.27; mp 176-178 °C;  $[\alpha]_D^{20}$  -14.8;  $MH^+$  397.

**2TFA·H-Tic-NH-CH<sub>2</sub>-Bid(N<sup>1</sup>-CH<sub>2</sub>-CH=CH<sub>2</sub>).** Boc-Tic-NH-CH<sub>2</sub>-Bid(N<sup>1</sup>-CH<sub>2</sub>-CH=CH<sub>2</sub>) was treated with TFA as reported for 2TFA·H-Tic-NH-CH<sub>2</sub>-Bid(N<sup>1</sup>-CH<sub>3</sub>): yield 0.18 g (92%); R<sub>f</sub> (A) 0.51; HPLC K' 4.27; mp 168-170 °C;  $[\alpha]_D^{20}$  -12.6;  $MH^+$  347.

**2TFA·H-Tic-NH-CH<sub>2</sub>-Bid(N<sup>1</sup>-CH<sub>2</sub>-c(C<sub>3</sub>H<sub>5</sub>)).** Boc-Tic-NH-CH<sub>2</sub>-Bid(N<sup>1</sup>-CH<sub>2</sub>-c(C<sub>3</sub>H<sub>5</sub>))

was treated with TFA as reported for 2TFA H-Tic-NH-CH<sub>2</sub>-Bid(N<sup>1</sup>-CH<sub>3</sub>): yield 0.19 g (92%); R<sub>f</sub> (A) 0.35; HPLC K' 2.91; mp 168-170 °C; [α]<sup>20</sup><sub>D</sub> -12.6; MH<sup>+</sup> 361.

**Boc-Dmt-Tic-NH-CH<sub>2</sub>-Bid(N<sup>1</sup>-CH<sub>3</sub>).** To a solution of Boc-Dmt-OH (0.05 g, 0.16 mmol) and 2TFA H-Tic-NH-CH<sub>2</sub>-Bid(N<sup>1</sup>-CH<sub>3</sub>) (0.09 g, 0.16 mmol) in DMF (10 mL) at 0 °C, NMM (0.03 mL, 0.32 mmol), HOBt (0.03 g, 0.18 mmol) and WSC (0.04 g, 0.18 mmol) were added. The reaction mixture was stirred for 3 h at 0 °C and 24 h at room temperature. After DMF was evaporated, the residue was dissolved in EtOAc and washed with NaHCO<sub>3</sub> (5% in H<sub>2</sub>O) and brine. The organic phase was dried (Na<sub>2</sub>SO<sub>4</sub>) and evaporated to dryness. The residue was precipitated from Et<sub>2</sub>O/Pe (1:9, v/v): yield 0.09 g (88%); R<sub>f</sub> (B) 0.87; HPLC K' 6.21; mp 157-159 °C; [α]<sup>20</sup><sub>D</sub> -19.2; MH<sup>+</sup> 613; <sup>1</sup>H NMR (DMSO-*d*<sub>6</sub>) δ 1.30-1.40 (m, 9H), 2.35 (s, 6H), 2.92-3.17 (m, 4H), 3.63 (s, 3H), 4.41-4.51 (m, 4H), 4.92 (m, 2H), 6.29 (s, 2H), 6.96-7.70 (m, 8H).

**Boc-Dmt-Tic-NH-CH<sub>2</sub>-Bid(N<sup>1</sup>-CH<sub>2</sub>-C<sub>6</sub>H<sub>5</sub>).** This compound was obtained by condensation of Boc-Dmt-OH with 2TFA H-Tic-NH-CH<sub>2</sub>-Bid(N<sup>1</sup>-CH<sub>2</sub>-C<sub>6</sub>H<sub>5</sub>) via WSC/HOBt as reported for Boc-Dmt-Tic-NH-CH<sub>2</sub>-Bid(N<sup>1</sup>-CH<sub>3</sub>): yield 0.07 g (83%); R<sub>f</sub> (B) 0.93; HPLC K' 7.88; mp 161-163 °C; [α]<sup>20</sup><sub>D</sub> -17.6; MH<sup>+</sup> 689; <sup>1</sup>H NMR (DMSO-*d*<sub>6</sub>) δ 1.30-1.40 (m, 9H), 2.35 (s, 6H), 2.92-3.17 (m, 4H), 4.41-4.51 (m, 4H), 4.92-4.99 (m, 4H), 6.29 (s, 2H), 6.96-7.70 (m, 13H).

**Boc-Dmt-Tic-NH-CH<sub>2</sub>-Bid(N<sup>1</sup>-CH<sub>2</sub>-CH=CH<sub>2</sub>).** This compound was obtained by condensation of Boc-Dmt-OH with 2TFA H-Tic-NH-CH<sub>2</sub>-Bid(N<sup>1</sup>-CH<sub>2</sub>-CH=CH<sub>2</sub>) via WSC/HOBt as reported for Boc-Dmt-Tic-NH-CH<sub>2</sub>-Bid(N<sup>1</sup>-CH<sub>3</sub>): yield 0.08 g (84%); R<sub>f</sub> (B) 0.79; HPLC K' 7.40; mp 155-157 °C; [α]<sup>20</sup><sub>D</sub> -15.2; MH<sup>+</sup> 639; <sup>1</sup>H NMR (DMSO-*d*<sub>6</sub>) δ

1.30-1.40 (m, 9H), 2.35 (s, 6H), 2.92-3.17 (m, 4H), 4.40-4.51 (m, 6H), 4.92 (m, 2H),  
5.15-5.17 (m, 2H), 5.83 (m, 1H), 6.29 (s, 2H), 6.96-7.70 (m, 8H).

**Boc-Dmt-Tic-NH-CH<sub>2</sub>-Bid(N<sup>1</sup>-CH<sub>2</sub>-c(C<sub>3</sub>H<sub>5</sub>)).** This compound was obtained by condensation of Boc-Dmt-OH with 2TFA·H-Tic-NH-CH<sub>2</sub>-Bid(N<sup>1</sup>-CH<sub>2</sub>-c(C<sub>3</sub>H<sub>5</sub>)) via WSC/HOBt as reported for Boc-Dmt-Tic-NH-CH<sub>2</sub>-Bid(N<sup>1</sup>-CH<sub>3</sub>): yield 0.06 g (76%); R<sub>f</sub>(B) 0.86; HPLC K' 7.64; mp 158-160 °C; [α]<sup>20</sup><sub>D</sub> -13.8; MH<sup>+</sup> 653; <sup>1</sup>H NMR (DMSO-*d*<sub>6</sub>) δ 0.06- 0.31 (m, 5H), 1.30-1.40 (m, 9H), 2.35 (s, 6H), 2.92-3.17 (m, 4H), 3.69 (m, 2H), 4.41-4.51 (m, 4H), 4.92 (m, 2H), 6.29 (s, 2H), 6.96-7.70 (m, 8H).

**Boc-Dmt-Tic-NH-CH<sub>2</sub>-Bid(N<sup>1</sup>-CH<sub>2</sub>-COOH).** To a solution of Boc-Dmt-Tic-NH-CH<sub>2</sub>-Bid(N<sup>1</sup>-CH<sub>2</sub>-COOEt) (ref. <sup>10</sup>) (0.15 g, 0.22 mmol) in EtOH (10 mL) at room temperature, 1 N NaOH (0.33 mL, 0.33 mmol) was added. The reaction mixture was stirred for 3 h at room temperature. After EtOH was evaporated, the residue was directly purified by preparative HPLC without any treatment: yield 0.13 g (90%); R<sub>f</sub>(B) 0.61; HPLC K' 7.01; mp 166-168 °C; [α]<sup>20</sup><sub>D</sub> -24.5; MH<sup>+</sup> 657; <sup>1</sup>H NMR (DMSO-*d*<sub>6</sub>) δ 1.30-1.40 (m, 9H), 2.35 (s, 6H), 2.92-3.17 (m, 4H), 4.41-4.51 (m, 4H), 4.67 (s, 2H), 4.92 (m, 2H), 6.29 (s, 2H), 6.96-7.70 (m, 8H).

**Boc-Dmt-Tic-NH-CH<sub>2</sub>-Bid(N<sup>1</sup>-CH<sub>2</sub>-CONH<sub>2</sub>).** A solution of Boc-Dmt-Tic-NH-CH<sub>2</sub>-Bid(N<sup>1</sup>-CH<sub>2</sub>-COOH) (0.13 g, 0.2 mmol) and NMM (0.02 mL, 0.2 mmol) in DMF (10 mL) was treated at -20 °C with isobutyl chloroformate (1.2 mL, 0.03 mmol). After 10 min at -20 °C, NH<sub>3</sub>(gas) was bubbled for 30 min. The reaction mixture was allowed to stir while slowly warming to room temperature (1 h) and was stirred 1 h at -20 °C and 3 h at room temperature. After DMF was evaporated, the residue was dissolved in EtOAc

and washed with  $\text{NaHCO}_3$  (5% in  $\text{H}_2\text{O}$ ) and brine. The organic phase was dried ( $\text{Na}_2\text{SO}_4$ ) and evaporated to dryness. The residue was precipitated from  $\text{Et}_2\text{O}/\text{Pe}$  (1:9, v/v): yield 0.11 g (87%);  $R_f$  (B) 0.69; HPLC  $K'$  7.88; mp 160-162 °C;  $[\alpha]_D^{20}$  -20.8;  $\text{MH}^+$  656;  $^1\text{H}$  NMR ( $\text{DMSO}-d_6$ )  $\delta$  1.30-1.40 (m, 9H), 2.35 (s, 6H), 2.92-3.17 (m, 4H), 4.41-4.51 (m, 4H), 4.62 (s, 2H), 4.92 (m, 2H), 6.29 (s, 2H), 6.96-7.70 (m, 8H).

**2TFA·H-Dmt-Tic-NH-CH<sub>2</sub>-Bid(N<sup>1</sup>-CH<sub>3</sub>) (1).** Boc-Dmt-Tic-NH-CH<sub>2</sub>-Bid(N<sup>1</sup>-CH<sub>3</sub>) (0.09 g, 0.15 mmol) was treated with TFA (1 mL) for 30 min. at room temperature.  $\text{Et}_2\text{O}/\text{Pe}$  (1:1, v/v) were added to the solution until the product precipitated: yield 0.1 g (95%);  $R_f$  (A) 0.45; HPLC  $K'$  4.32; mp 158-160 °C;  $[\alpha]_D^{20}$  -22.4;  $\text{MH}^+$  513;  $^1\text{H}$  NMR ( $\text{DMSO}-d_6$ )  $\delta$  2.35 (s, 6H), 2.92-3.17 (m, 4H), 3.63 (s, 3H), 3.95 (m, 1H); 4.41-4.51 (m, 4H), 4.92 (m, 1H), 6.29 (s, 2H), 6.96-7.70 (m, 8H).

**2TFA·H-Dmt-Tic-NH-CH<sub>2</sub>-Bid(N<sup>1</sup>-CH<sub>2</sub>-C<sub>6</sub>H<sub>5</sub>) (2).** Boc-Dmt-Tic-NH-CH<sub>2</sub>-Bid(N<sup>1</sup>-CH<sub>2</sub>-C<sub>6</sub>H<sub>5</sub>) was treated with TFA as reported for 2TFA·H-Dmt-Tic-NH-CH<sub>2</sub>-Bid(N<sup>1</sup>-CH<sub>3</sub>): yield 0.04 g (93%);  $R_f$  (A) 0.58; HPLC  $K'$  6.99; mp 161-163 °C;  $[\alpha]_D^{20}$  -16.7;  $\text{MH}^+$  589;  $^1\text{H}$  NMR ( $\text{DMSO}-d_6$ )  $\delta$  2.35 (s, 6H), 2.92-3.17 (m, 4H), 3.95 (m, 1H), 4.41-4.51 (m, 4H), 4.92-4.99 (m, 3H), 6.29 (s, 2H), 6.96-7.70 (m, 13H).

**2TFA·H-Dmt-Tic-NH-CH<sub>2</sub>-Bid(N<sup>1</sup>-CH<sub>2</sub>-CH=CH<sub>2</sub>) (3).** Boc-Dmt-Tic-NH-CH<sub>2</sub>-Bid(N<sup>1</sup>-CH<sub>2</sub>-CH=CH<sub>2</sub>) was treated with TFA as reported for 2TFA·H-Dmt-Tic-NH-CH<sub>2</sub>-Bid(N<sup>1</sup>-CH<sub>3</sub>): yield 0.05 g (91%);  $R_f$  (A) 0.56; HPLC  $K'$  5.38; mp 166-168 °C;  $[\alpha]_D^{20}$  -17.6;  $\text{MH}^+$  539;  $^1\text{H}$  NMR ( $\text{DMSO}-d_6$ )  $\delta$  2.35 (s, 6H), 2.92-3.17 (m, 4H), 3.95 (m, 1H), 4.40-4.51 (m, 6H), 4.92 (m, 1H), 5.15-5.17 (m, 2H), 5.83 (m, 1H), 6.29 (s, 2H), 6.96-7.70 (m, 8H).

**2TFA·H-Dmt-Tic-NH-CH<sub>2</sub>-Bid(N<sup>1</sup>-CH<sub>2</sub>-c(C<sub>3</sub>H<sub>5</sub>)) (4).** Boc-Dmt-Tic-NH-CH<sub>2</sub>-Bid(N<sup>1</sup>-CH<sub>2</sub>-c(C<sub>3</sub>H<sub>5</sub>)) was treated with TFA as reported for 2TFA·H-Dmt-Tic-NH-CH<sub>2</sub>-Bid(N<sup>1</sup>-CH<sub>3</sub>): yield 0.04 g (89%); R<sub>f</sub> (A) 0.54; HPLC K' 5.89; mp 164-166 °C; [α]<sup>20</sup><sub>D</sub> -14.9; MH<sup>+</sup> 553; <sup>1</sup>H NMR (DMSO-*d*<sub>6</sub>) δ 0.06- 0.31 (m, 5H), 2.35 (s, 6H), 2.92-3.17 (m, 4H), 3.69 (m, 2H), 3.95 (m, 1H) 4.41-4.51 (m, 4H), 4.92 (m, 1H), 6.29 (s, 2H), 6.96-7.70 (m, 8H).

**2TFA·H-Dmt-Tic-NH-CH<sub>2</sub>-Bid(N<sup>1</sup>-CH<sub>2</sub>-COOEt) (5).** Boc-Dmt-Tic-NH-CH<sub>2</sub>-Bid(N<sup>1</sup>-CH<sub>2</sub>-COOEt)<sup>10</sup> was treated with TFA as reported for 2TFA·H-Dmt-Tic-NH-CH<sub>2</sub>-Bid(N<sup>1</sup>-CH<sub>3</sub>): yield 0.05 g (93%); R<sub>f</sub> (A) 0.81; HPLC K' 6.40; mp 162-164 °C; [α]<sup>20</sup><sub>D</sub> -34.7; MH<sup>+</sup> 585; <sup>1</sup>H NMR (DMSO-*d*<sub>6</sub>) δ 1.30 (t, 3H), 2.35 (s, 6H), 2.92-3.17 (m, 4H), 3.95 (m, 1H), 4.12 (q, 2H), 4.41-4.69 (m, 6H), 4.92 (m, 1H), 6.29 (s, 2H), 6.96-7.70 (m, 8H).

**2TFA·H-Dmt-Tic-NH-CH<sub>2</sub>-Bid(N<sup>1</sup>-CH<sub>2</sub>-CONH<sub>2</sub>) (6).** Boc-Dmt-Tic-NH-CH<sub>2</sub>-Bid(N<sup>1</sup>-CH<sub>2</sub>-CONH<sub>2</sub>) was treated with TFA as reported for 2TFA·H-Dmt-Tic-NH-CH<sub>2</sub>-Bid(N<sup>1</sup>-CH<sub>3</sub>): yield 0.04 g (90%); R<sub>f</sub> (A) 0.77; HPLC K' 5.51; mp 167-169 °C; [α]<sup>20</sup><sub>D</sub> -30.2; MH<sup>+</sup> 556; <sup>1</sup>H NMR (DMSO-*d*<sub>6</sub>) δ 2.35 (s, 6H), 2.92-3.17 (m, 4H), 3.95 (m, 1H), 4.41-4.62 (m, 6H), 4.92 (m, 1H), 6.29 (s, 2H), 6.96-7.70 (m, 8H).



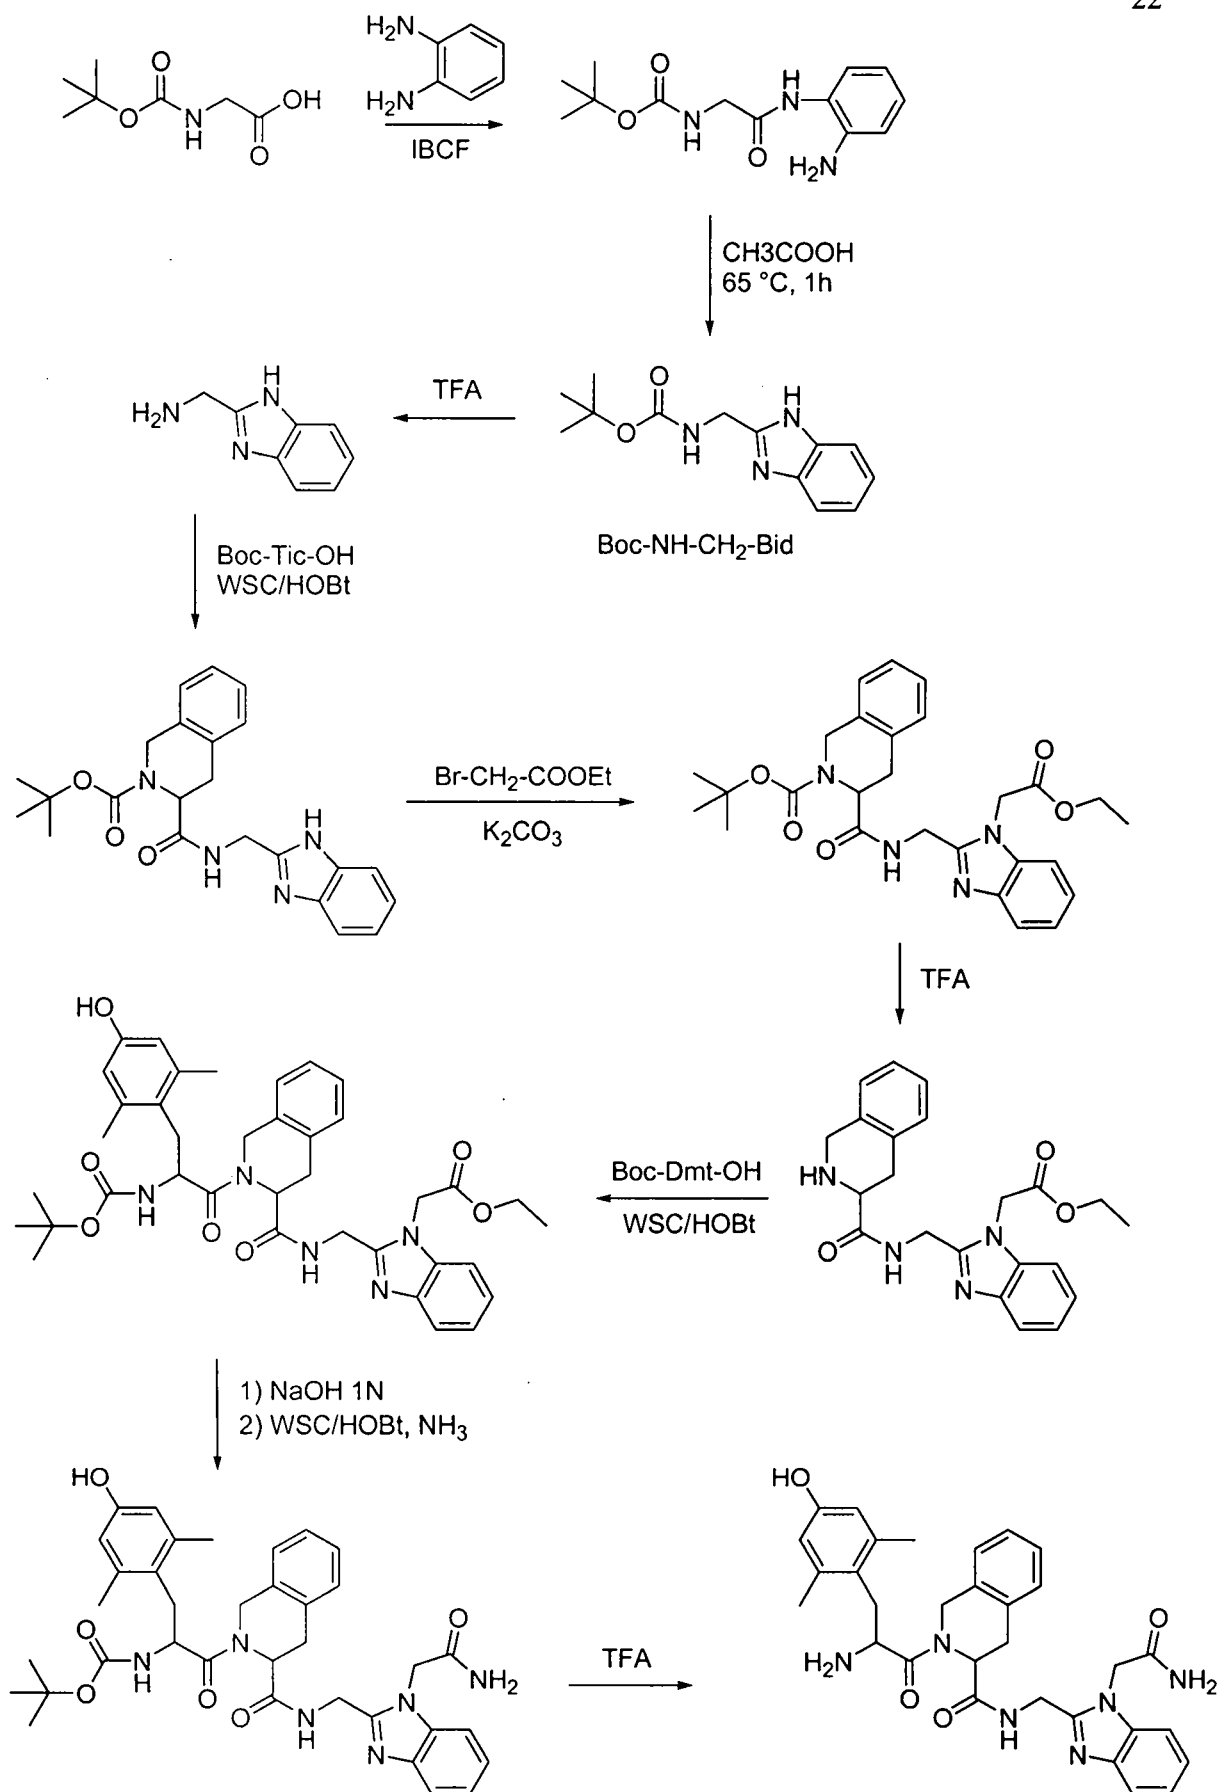

**Scheme.** Synthesis of compound 6 (H-Dmt-Tic-NH-CH<sub>2</sub>-Bid(N<sup>1</sup>-CH<sub>2</sub>-CONH<sub>2</sub>)).

**Table.** Physicochemical properties and elemental analysis of compounds 1-6.

| Comp. | Formula                                                                      | MH <sup>+</sup> , <i>m/z</i> |       | C     | H    | N     |
|-------|------------------------------------------------------------------------------|------------------------------|-------|-------|------|-------|
| 1     | C <sub>34</sub> H <sub>35</sub> F <sub>6</sub> N <sub>5</sub> O <sub>7</sub> | 513                          | Calc  | 55.21 | 4.77 | 9.47  |
|       |                                                                              |                              | Found | 55.05 | 4.70 | 9.30  |
| 2     | C <sub>40</sub> H <sub>39</sub> F <sub>6</sub> N <sub>5</sub> O <sub>7</sub> | 589                          | Calc  | 58.89 | 4.82 | 8.59  |
|       |                                                                              |                              | Found | 59.18 | 4.98 | 8.27  |
| 3     | C <sub>36</sub> H <sub>37</sub> F <sub>6</sub> N <sub>5</sub> O <sub>7</sub> | 539                          | Calc  | 56.47 | 4.87 | 9.15  |
|       |                                                                              |                              | Found | 56.73 | 5.01 | 9.27  |
| 4     | C <sub>37</sub> H <sub>39</sub> F <sub>6</sub> N <sub>5</sub> O <sub>7</sub> | 553                          | Calc  | 56.99 | 5.04 | 8.98  |
|       |                                                                              |                              | Found | 56.86 | 4.86 | 8.84  |
| 5     | C <sub>37</sub> H <sub>39</sub> F <sub>6</sub> N <sub>5</sub> O <sub>9</sub> | 585                          | Calc  | 54.75 | 4.84 | 8.36  |
|       |                                                                              |                              | Found | 54.59 | 4.77 | 8.19  |
| 6     | C <sub>35</sub> H <sub>36</sub> F <sub>6</sub> N <sub>6</sub> O <sub>8</sub> | 556                          | Calc  | 53.71 | 4.64 | 10.74 |
|       |                                                                              |                              | Found | 54.00 | 4.80 | 10.42 |
